# Supplementary material for: Cdc48 and ubiquilins confer selective anterograde protein sorting and entry into the multivesicular body in yeast
Source: PubMed Central journal article supplement — Mol Biol Cell. 2018 Apr 15;29(8):948–63. doi: 10.1091/mbc.E17-11-0652 (PMC5896933; doi:10.1091/mbc.e17-11-0652), 2018-04-15
Supplement: mbc-29-948-s001.pdf [file mbc-29-948-s001.pdf]

# Supplemental Materials

*Molecular Biology of the Cell*

Kama et al.

**A.** CDC48 - peptide coverage

MGEHHKPLDASGVDFREEDKTATALLRRKKKdnlldda<sup>indn</sup>SVIAINSNTMDKLELF  
 RgdtvlvkGKKRkdtvli<sup>vidde</sup>ledgacRINRVVRNLRIRLgdlvtih<sup>pepd</sup>iKYATRI  
 SVLPIDATIEGITGNLFDVFLKPYFVEAYRPRVKGDHFVVRGMRQVEFKVVDVEPEEYAVV  
 AQDTIHHMEGEPINREDEENNMEVGYYDIGGCRKQMAQIREMVELPLRHPQLFKATGKPKP  
 Rgvlmyp<sup>pgt</sup>gkTLMARAVANETGAFFFLINGPEVMSKMGASESNLRKa<sup>feeaeknapa</sup>i  
 ifideidsiapkRDKTNGEVERRvvsqllt<sup>lmdgm</sup>KARSNVVTAATNRPN<sup>SIDP</sup>ALRRFGR  
 FDREVDIGIPDATGRLEVLRIHTKMKLADDVDLEALAAETHGYVGADIASLSEANMQQIR  
 ekmdl<sup>id</sup>dedeidaEVLDSLGV<sup>TMDNFR</sup>falgnsnpsa<sup>lzet</sup>VVESVNV<sup>TMD</sup>DVGGLDEIK  
 EELKetveypvlhpdqvtkFGLSPSKgvlfyg<sup>pgt</sup>gkTLLAKavatewsanfisvKGPELL  
 SMNYGESENIRDFDKARaaaptvvf<sup>ldeld</sup>siakRggs<sup>lqdag</sup>gsdrvvng<sup>litemd</sup>g  
 mnAKKNVFVIGATNRPDQIDPALLRPGRLDQLYVPLPDENAR<sup>lsil</sup>naqlrKtplepgle<sup>l</sup>  
 ta<sup>ak</sup>atqgfsqadllyl<sup>vqr</sup>AAKYAIKDSIEAHRQHEAEKEV<sup>Kged</sup>vemtdegaKAEQE  
 PEVDVPVYITKEHFAEAMKTAKR<sup>svsd</sup>aelrRYEAYSQMKASRGQFSNFNFNDAPLGTAT  
 DNANSNNSAPSGAAGFSNAEDDDLYS

**B.**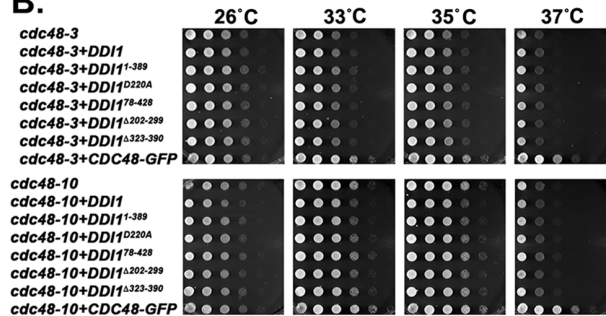**C.**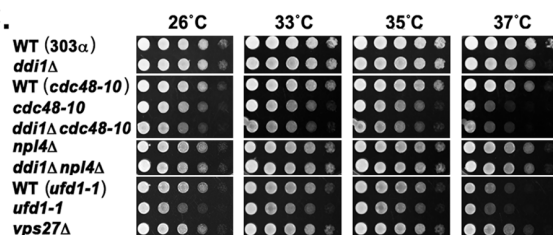**D.**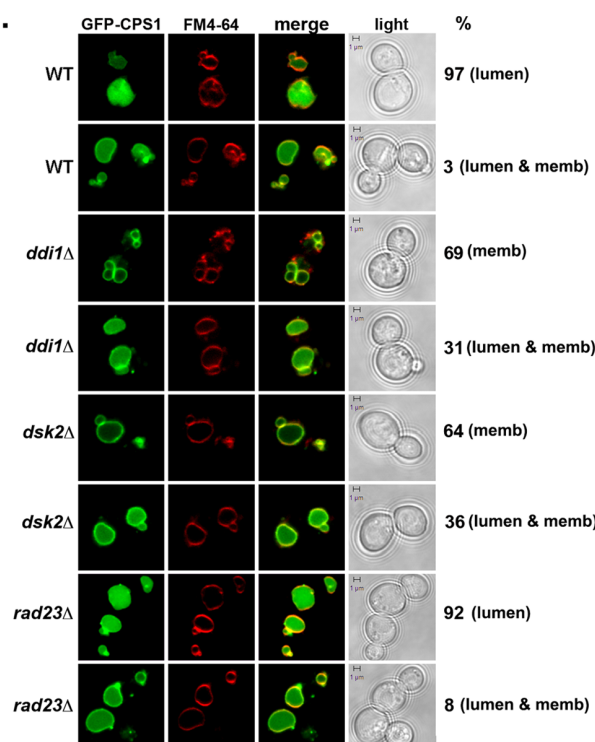

**Figure S1. Ddi1 interacts physically with Cdc48.** (A) Cdc48 coverage. The primary sequence of *S. cerevisiae* Cdc48 protein is presented. Underlined and lowercase amino acid designations

indicate peptide sequences identified by mass spectrometry in bands excised from SDS-PAGE-resolved and Coomassie-labeled HA-Ddi1 and HA-Ddi1<sup>D220A</sup> precipitates. **(B). Over-expression of Ddi1 or Ddi1 truncation mutants do not ameliorate the growth defects of the *cdc48-3* or *cdc48-10* alleles.** *cdc48-3* and *cdc48-10* cells were transformed with vector alone (pAD54) or pAD54-based plasmids expressing HA-tagged Ddi1 or Ddi1 truncation mutants (*e.g.* Ddi1<sup>1-389</sup>, Ddi1<sup>D220A</sup>, Ddi1<sup>78-428</sup>, Ddi1<sup>Δ202-299</sup>, and Ddi1<sup>Δ323-390</sup>) or a single-copy plasmid expressing Cdc48-GFP. Cells were grown to mid-log phase on glucose-containing medium at 26°C before serial dilution (10-fold each) and plating by drops onto pre-warmed solid medium. Plates were grown for 2 to 3 days at the indicated temperatures before photo-documentation. **(C) The deletion of *DDI1* has no effect upon the growth of *cdc48* and *npl4* mutants.** WT control cells (*e.g.* W303 and the background strains for the *cdc48-10* and *ufd1-1* mutations), *ddi1Δ*, *cdc48-10*, *ddi1Δ cdc48-10*, *npl4Δ*, *ddi1Δ npl4Δ*, *ufd1-1*, and *vps27Δ* cells were grown to mid-log phase on glucose-containing medium at 26°C before serial dilution (10-fold each) and plating by drops onto pre-warmed solid medium. Plates were grown for 2-3 days at the indicated temperatures before photo-documentation. **(D) Cps1 trafficking to the vacuole lumen is inhibited in cells lacking *DDI1* or *DSK2*, but not *RAD23*.** WT (W303 background) control cells and cells lacking *DDI1*, *DSK2*, or *RAD23* (*i.e.* *ddi1Δ*; *dsk2Δ rad23Δ* cells; W303 background) were transformed with a plasmid expressing GFP-Cps1. Cells were grown to mid-log at 26°C, pulse-chase labeled with FM4-64, and examined by confocal microscopy. *Merge* indicates merger of the GFP and FM4-64 windows. *Light* indicates the DIC window. % indicates the percentage of cells having GFP-Cps1 localized to the vacuolar limiting membrane (memb), vacuolar lumen (lumen), or both (lumen & memb). Statistics are presented in Table 1. Size bar = 1μm.

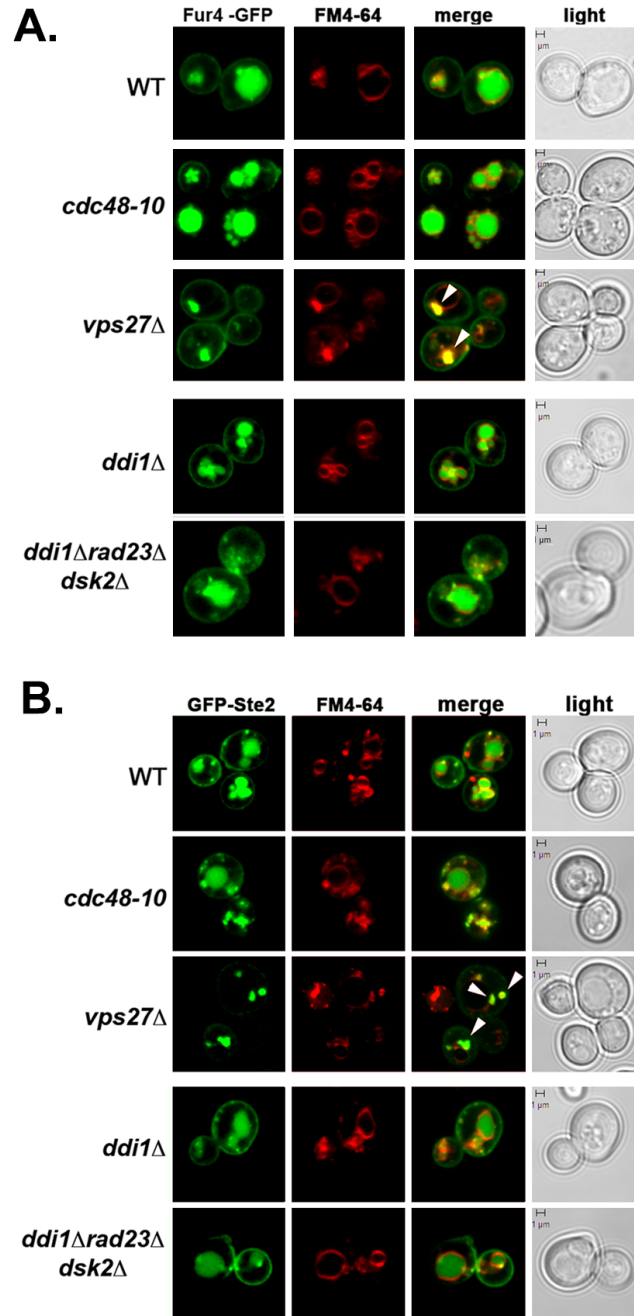

**Figure S2. Trafficking of Fur4 and Ste2 to the vacuole is unaffected in cells bearing mutations in *CDC48* or the yeast ubiquilins. (A) Localization of Fur4-GFP to the plasma membrane and vacuole is not affected in cells bearing the *cdc48-10* allele or in *ddi1Δ* cells and cells lacking all three ubiquilins.** WT control (W303) and *cdc48-10*, *vps27Δ*, *ddi1Δ*, and *ddi1Δ rad23Δ dsk2Δ* cells were transformed with a single-copy plasmid expressing Fur4-GFP. Cells were grown to mid-log phase on glucose-containing medium at 26°C at, pulse-chase labeled with FM4-64, and examined by confocal microscopy. White arrows indicate the position of the class E compartment wherein GFP-Fur4 and FM4-64 accumulate in *vps27Δ* cells (a class E *vps* mutant). *Merge* indicates merger of the GFP and FM4-64 windows. *Light* indicates the DIC window. Size bar = 1μm. Additional WT control cells of the *cdc48-10*, *vps27Δ*, and *ddi1Δ* backgrounds (e.g. KFY100 and BY4741, respectively) were examined, but gave identical results to that shown for the WT cells in the figure (data not shown). **(B) The intracellular localization of Ste2-GFP was not affected in *cdc48-10* cells or in cells either lacking *DDI1* or all three ubiquilins.** WT control (W303) and *cdc48-10*, *vps27Δ*, *ddi1Δ*, and *ddi1Δ rad23Δ dsk2Δ* cells

were transformed with a single-copy plasmid expressing Ste2-GFP. Cells were grown to mid-log phase on glucose-containing medium at 26°C, pulse-chase labeled with FM4-64, and examined by confocal microscopy. White arrows indicate the position of the class E compartment wherein Ste2-GFP and FM4-64 accumulate in *vps27Δ* cells (a class E *vps* mutant). *Merge* indicates merger of the GFP and FM4-64 windows. *Light* indicates the DIC window. Size bar = 1μm. Additional WT control cells of the *cdc48-10*, *vps27Δ*, and *ddi1Δ* backgrounds (e.g. KFY100 and BY4741, respectively,) were examined, but gave identical results to that shown for the WT cells in the figure (data not shown).

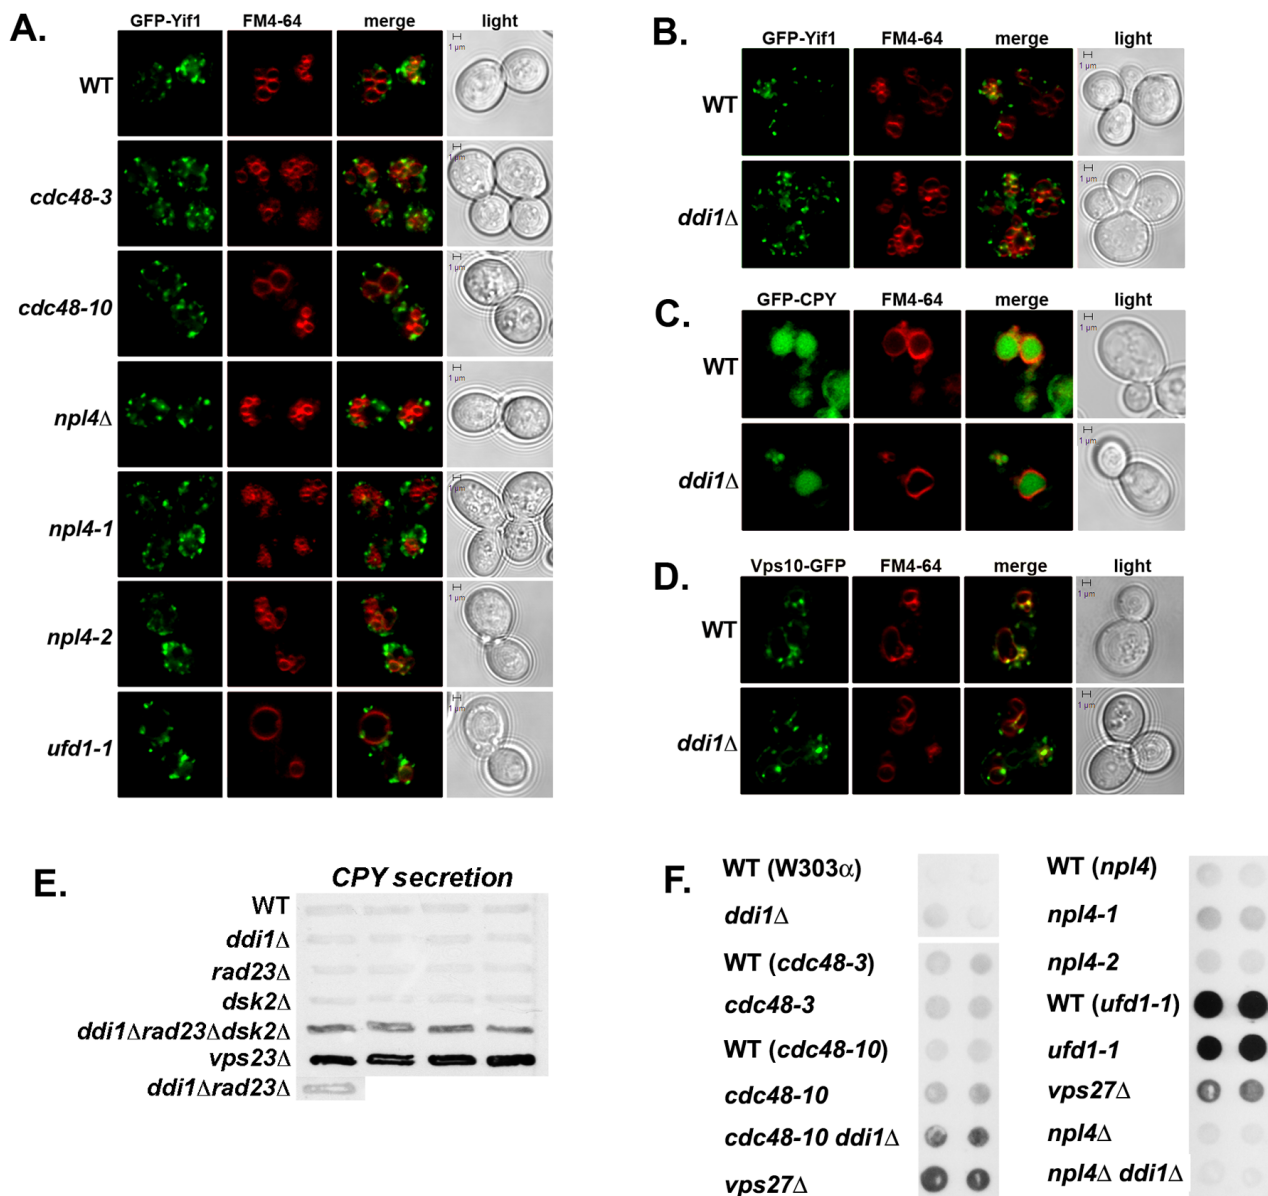

**Figure S3. Individual mutations in *DDII*, *DSK2*, *RAD23*, *CDC48*, *NPL4*, and *UFD1* do not affect CPY secretion, but combined *ddi1Δ dsk2Δ rad23Δ* and *ddi1Δ cdc48-10* mutations show a partial secretion effect.** (A) Localization of GFP-Yif1 in WT, *cdc48-3*, *cdc48-10*, *npl4Δ*, *npl4-1*, *npl4-2*, and *ufd1-1* cells. WT control (e.g. BY4741 and W303 backgrounds and background strains for the *cdc48-3*, *cdc48-10* and *ufd1-1* mutations), *cdc48-3*, *cdc48-10*, *npl4Δ*, *npl4-1*, *npl4-2*, and *ufd1-1* cells were transformed with a single-copy plasmid expressing GFP-Yif1. Cells were grown to mid-log phase cells on glucose containing medium at 26°C, pulse-chase labeled with FM4-64, and examined by confocal microscopy. *Merge* indicates merger of the GFP and FM4-64 windows. *Light* indicates the DIC window. Size bar = 1 μm. (B) Localization of GFP-Yif1, GFP-CPY, and Vps10-GFP in WT and *ddi1Δ* cells. WT control (W303), and *ddi1Δ* cells were transformed with a single-copy plasmid expressing GFP-Yif1. Cells were grown to mid-log phase on glucose-containing medium at 26°C, pulse-chase labeled with FM4-64, and examined by confocal microscopy. *Merge* indicates merger of the GFP and FM4-64 windows. *Light* indicates the DIC window. Size bar = 1 μm. (C) Localization of GFP-CPY in WT and *ddi1Δ* cells. WT control (W303), and *ddi1Δ* cells were transformed with a

single-copy plasmid expressing CPY<sup>1-50</sup>-GFP. Cells were grown to mid-log phase on glucose-containing medium at 26°C, shifted to galactose-containing medium for 12h at 26°C to induce expression, pulse-chase labeled with FM4-64, and examined by confocal microscopy. *Merge* indicates merger of the GFP and FM4-64 windows. *Light* indicates the DIC window. Size bar = 1μm. **(D) Localization of Vps10-GFP in wild-type and *ddi1Δ* cells.** WT control (W303), and *ddi1Δ* cells were transformed with a single-copy plasmid expressing Vps10-GFP. Cells were grown to mid-log phase cells on glucose containing medium at 26°C, pulse-chase labeled with FM4-64, and examined by confocal microscopy. *Merge* indicates merger of the GFP and FM4-64 windows. *Light* indicates the DIC window. Size bar = 1μm. **(E) Combined deletions in the ubiquilin paralogs leads to CPY secretion.** WT yeast (BY4741) and various deletion mutants (e.g. *ddi1Δ*, *rad23Δ*, *ddi1Δ rad23Δ*, *dsk2Δ*, *ddi1Δ rad23Δ dsk2Δ*, and *vps23Δ* cells) were patched out and grown on solid medium, replica plated onto nitrocellulose filters and subjected to anti-CPY immunoblot assay, as detailed in below in the detailed in the *Materials and Methods*. **(F) Combined *ddi1Δ* and *cdc48-10* mutations lead to a CPY secretion phenotype.** WT control (e.g. W303 and the backgrounds for the *cdc48-3*, *cdc48-10*, *npl4*, and *ufd1-1* cells), *ddi1Δ*, *cdc48-3*, *cdc48-10*, *cdc48-10 ddi1Δ*, *npl4-1*, *npl4-2*, *ufd1-1*, *npl4Δ*, *npl4Δ ddi1Δ*, and *vps27Δ* cells were grown on glucose-containing medium at 26°C before serial dilution (10-fold each) and plating by drops onto pre-warmed solid medium. Plates were grown for 2-3 days, replica plated onto nitrocellulose filters, and subjected to anti-CPY immunoblot assay, as detailed in the *Materials and Methods*.

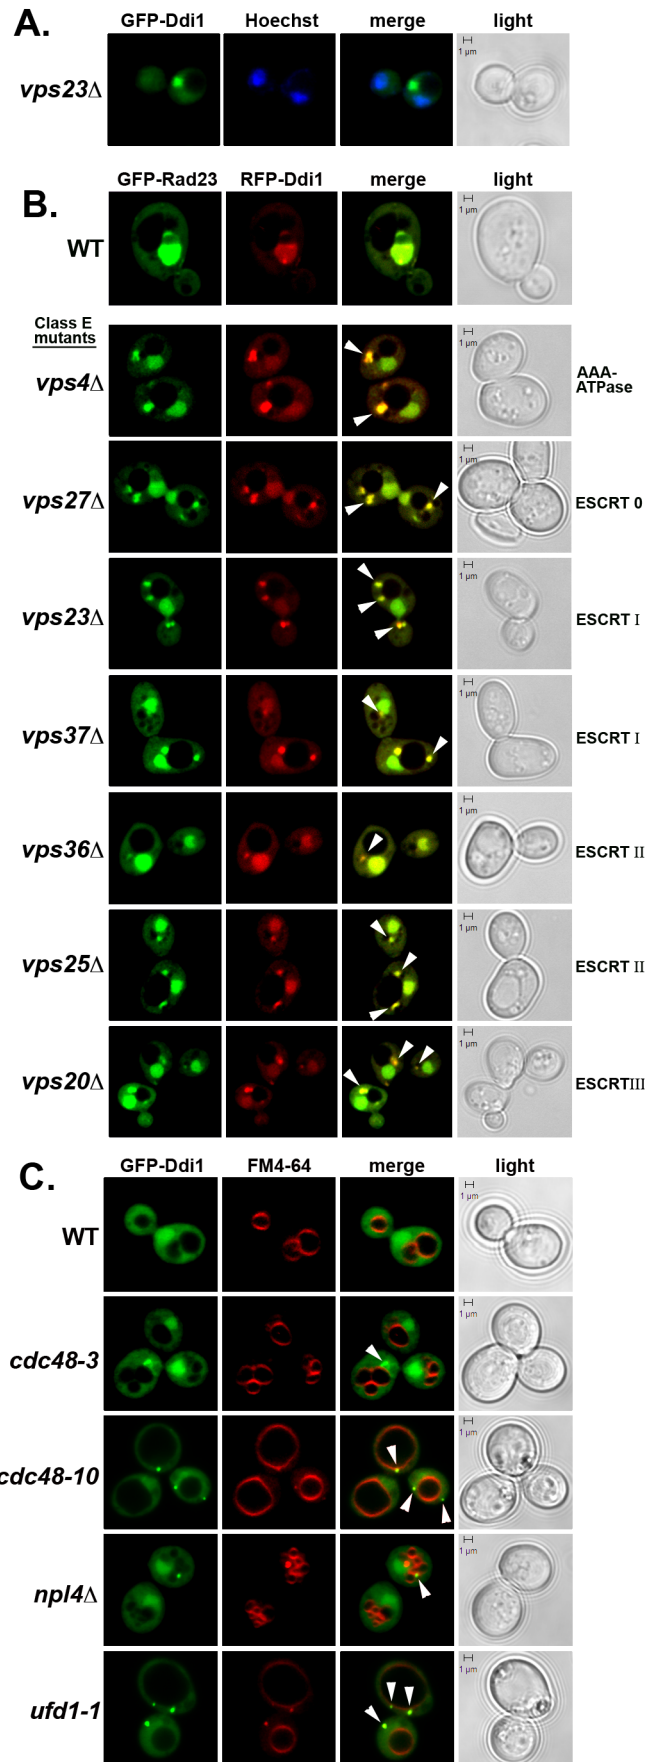

**Figure S4. Ddi1 and Rad23 co-label the perivacuolar class E compartment in MVB mutants and Ddi1 labels a perivacuolar compartment in cells bearing mutations in *CDC48*, *NPL4*, and *UFD1*. (A) GFP-Ddi1-labeled puncta in *vps23Δ* cells are non-nuclear. *vps23Δ* cells carrying the genome-integrated copy of *GFP-DDI1* under the control of a *GAL* promoter**

(GGY13 cells) were grown to mid-log phase on galactose-containing medium and labeled with Hoechst dye (2 $\mu$ g/ml) for 10min prior to visualization by confocal microscopy. *Merge* indicates merger of the GFP and Hoechst windows. *Light* indicates the DIC window. Size bar = 1 $\mu$ m. **(B) GFP-Rad23 and RFP-Ddi1 co-localize in wild-type cells and class E/MVB mutants.** Class E mutant cells (*e.g.* *vps4* $\Delta$ , *vps27* $\Delta$ , *vps23* $\Delta$ , *vps37* $\Delta$ , *vps36* $\Delta$ , *vps25* $\Delta$ , and *vps20* $\Delta$  cells) were transformed with a multi-copy plasmids expressing GFP-Rad23 and RFP-Ddi1. Cells were grown to mid-log phase cells on glucose-containing medium at 26°C, pulse-chase labeled with FM4-64, and examined by confocal microscopy. *Merge* indicates merger of the GFP and RFP windows. *Light* indicates the DIC window. Size bar = 1 $\mu$ m. **(C) In addition to nuclear and cytoplasmic labeling, Ddi1 localizes to a perivacuolar compartment in cells bearing mutations in CDC48, NPL4, and UFD1.** WT control (*e.g.* BY4741 and the backgrounds for the *cdc48-3*, *cdc48-10*, and *ufd1-1* strains), *cdc48-3*, *cdc48-10*, *npl4* $\Delta$ , and *ufd1-1* cells were transformed with a multi-copy plasmid expressing GFP-Ddi1. Mid-log phase cells grown on glucose containing medium at 26°C, pulse-chase labeled with FM4-64, and examined by confocal microscopy. *Merge* indicates merger of the GFP and FM4-64 windows. *Light* indicates the DIC window. Size bar = 1 $\mu$ m. Only the WT background for *cdc48-10* cells (KFY100) is shown; similar results were obtained with the other backgrounds (data not shown).

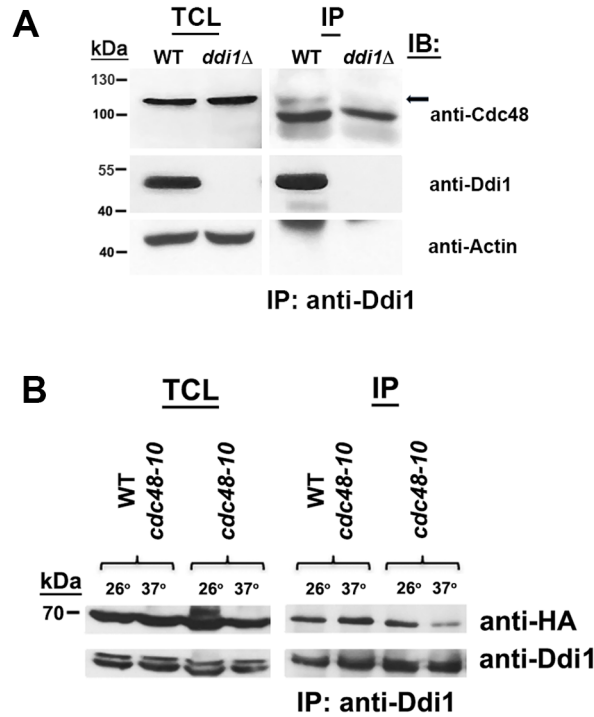

**Figure S5. Endogenous Ddi1 binds endogenous Cdc48, while its binding to Npl4 is reduced upon the attenuation of Cdc48 function.** **A. Endogenous Ddi1 and Cdc48 co-precipitate.** WT control and *ddi1* $\Delta$  cells were grown to mid-log phase on glucose-containing YPD medium at 26°C and processed for immunoprecipitation using anti-Ddi1 antibodies, as described in the *Materials and Methods*. Native endogenously-expressed Cdc48 was detected using polyclonal anti-Cdc48 antibodies (1:500) and native endogenously-expressed Ddi1 was detected using polyclonal anti-Ddi1 antibodies (1:3000). **B. Ddi1 binding to Npl4 is reduced upon the attenuation of Cdc48 function.** WT control (*cdc48-10* background) and *cdc48-10* cells were transformed with a multi-copy plasmid expressing HA-Npl4. Cells were grown to mid-log phase cells on glucose-containing synthetic medium at 26°C and either maintained at 26°C or shifted to 37°C for 1hr. Cells were processed for immunoprecipitation using anti-Ddi1 antibodies, as described in the *Materials and Methods*. Npl4 was detected using monoclonal anti-HA antibodies (1:1000) and native Ddi1 was detected using polyclonal anti-Ddi1 antibodies (1:3000). In this representative experiment, the level of Npl4 bound to Ddi1 declined by 56% in *cdc48-10* cells after the temperature shift, while it was unchanged (after normalization for precipitated Ddi1 levels) in the WT background.

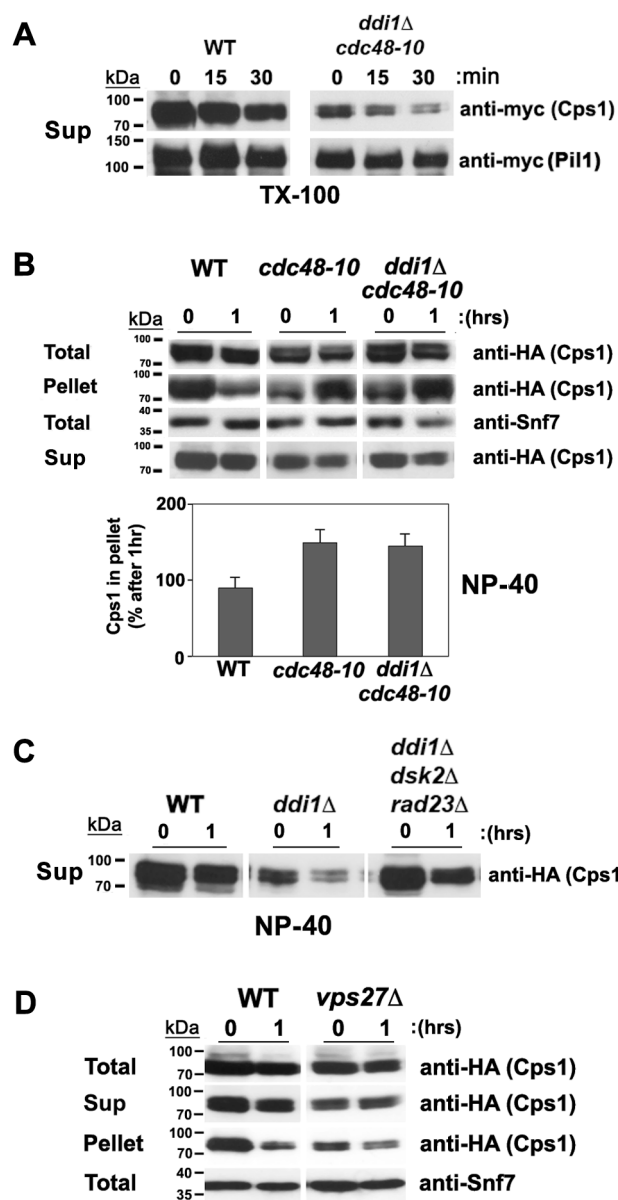

**Figure S6. Soluble Cps1 declines while insoluble Cps1 increases in *cdc48-10*, *ddi1Δ*, *cdc48-10 ddi1Δ*, and *ddi1Δ dsk1Δ rad23Δ* cells.** (A) The fraction of detergent-soluble myc-Cps1, but not myc-Pil1, decreases in *cdc48-10 ddi1Δ* cells after CHX treatment. Yeast expressing endogenous myc-Cps1 or myc-Pil1 from their genomic loci in WT and *cdc48-10 ddi1Δ* cells were subjected to a cycloheximide (CHX)-chase degradation/sedimentation assay to resolve the amount of TX-100 detergent-soluble Cps1 or Pil1 in the pellet fraction, as described under *Materials and Methods*. Samples were removed after 0, 15, and 30min of CHX treatment before processing to determine the relative amounts of myc-Cps1 in the total, pellet, and supernatant (see Figure 5A and B for total and pellet) fractions using anti-myc antibodies. The amount of soluble and insoluble Cps1 after 1hr was normalized to the loading control, after which the percentage was calculated relative to the amount at 0hrs. A representative experiment is shown whereby myc-Cps1 levels in the detergent-soluble fraction (*i.e.* supernatant) decline substantially over time, whereas as myc-Pil1 levels remain relatively steady. kDa = kilodaltons (B) The fraction of NP40-insoluble Cps1 increases in *cdc48-10* and *cdc48-10 ddi1Δ* cells. WT control cells (*cdc48-10* background), *cdc48-10*, and *cdc48-10 ddi1Δ* cells transformed with a plasmid expressing HA-Cps1 were subjected to the cycloheximide-chase degradation/sedimentation assay shown in A to resolve the amount of NP-40 detergent-insoluble and -soluble Cps1, as described under *Materials and Methods*. Samples of the total cell lysate

(TCL; Total), insoluble pellet (Pellet), and soluble (*i.e.* supernatant; Sup) fraction were resolved by SDS-PAGE and detected in Westerns with anti-HA (1:1000) abs. TCL samples were also probed with anti-Snf7 abs (1:2000) as a loading control (Snf7 is not degraded upon CHX treatment, unlike actin). The amount of soluble and insoluble Cps1 after 1hr was normalized to the loading control, after which the percentage was calculated relative to the amount at 0hrs. A representative experiment is shown, whereby the level of insoluble Cps1 increased by 71% and 76% over that of WT cells in the *cdc48-10* and *cdc48-10 ddi1Δ* pellet fractions after 1hr, respectively. A histogram showing average±standard deviation of 4 experiments is shown beneath. **(C) The fraction of NP-40 detergent-soluble Cps1 decreases in *ddi1Δ* and *ddi1Δ dsk2Δ rad23Δ* cells.** WT control cells (W303), *ddi1Δ*, and *ddi1Δ dsk2Δ rad23Δ* cells expressing HA-Cps1 were subjected to the same procedure as in *A* and the percentage of soluble Cps1 in the supernatant fraction after 1hr was calculated after the normalization for gel loading and expression (see Figure 5C for results with total and pellet fractions). A representative experiment is shown. **(D) The detergent-insoluble Cps1 fraction decreases in *vps27Δ* cells.** WT control cells and *vps27Δ* cells transformed with a plasmid expressing HA-Cps1 were subjected to the cycloheximide-chase degradation/sedimentation assay described in *A* to resolve the amount of NP-40 detergent-insoluble and -soluble Cps1. Samples of the total cell lysate (TCL; Total), insoluble pellet (Pellet), and soluble (*i.e.* supernatant; Sup) fractions were resolved by SDS-PAGE and detected in Westerns with anti-HA (1:1000) abs. TCL samples were also probed with anti-Snf7 abs (1:2000) as a loading control. The amount of insoluble Cps1 in the pellet was calculated relative to the amount at 0hrs, as described above. A representative experiment is shown.

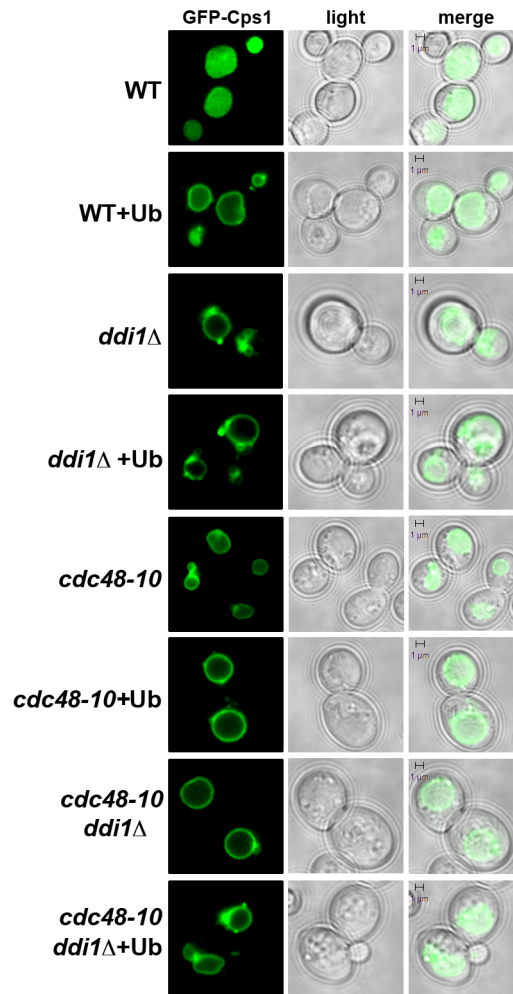

**Figure S7. Ubiquitin over-expression does not rescue Cps1 mistrafficking in *ddi1Δ*, *cdc48-10*, and *cdc48-10 ddi1Δ* cells.** WT control (e.g. W303 and the backgrounds for the *cdc48-10*, strains), *ddi1Δ*, *cdc48-10*, and *cdc48-10 ddi1Δ* cells were transformed with multicopy plasmids expressing GFP-Cps1 and ubiquitin (Ub; *UBL4*). Cells grown to mid-log phase on glucose containing medium at 26°C were examined by confocal microscopy. *Merge* indicates merger of the GFP and light windows. *Light* indicates the DIC window. Size bar = 1 μm. Only one WT cell background (e.g. W303) is shown, the others were identical with respect to Cps1 localization.

**Table S1. Yeast strains used in this study**

| Name                                                                                      | Genotype                                                                                                                                                                             | Source      |
|-------------------------------------------------------------------------------------------|--------------------------------------------------------------------------------------------------------------------------------------------------------------------------------------|-------------|
| W303-1b                                                                                   | <i>MAT<math>\alpha</math> can1-100 his3-2,15 leu2-3,112 lys2-1 trp1-1 ura3-1 ade2-1</i>                                                                                              | J. Gerst    |
| BY4741                                                                                    | <i>MATa his3<math>\Delta</math>1 leu2<math>\Delta</math>0 met15<math>\Delta</math>0 ura3<math>\Delta</math>0</i>                                                                     | Euroscarf   |
| yPC1507 ( <i>cdc48-3</i> WT background)                                                   | <i>MATa ura3-52 his3<math>\Delta</math>200 leu2<math>\Delta</math>1 trp1<math>\Delta</math>63</i>                                                                                    | P. Carvalho |
| yPC1614 ( <i>cdc48-3</i> )                                                                | <i>MATa ura3-52 his3<math>\Delta</math>200 leu2<math>\Delta</math>1 trp1<math>\Delta</math>63 <i>cdc48-3<sup>ts</sup></i></i>                                                        | P. Carvalho |
| RK8 ( <i>cdc48-3 ddi1<math>\Delta</math></i> )                                            | <i>MATa ura3-52 his3<math>\Delta</math>200 leu2<math>\Delta</math>1 trp1<math>\Delta</math>63 <i>cdc48-3<sup>ts</sup> ddi1<math>\Delta</math>::NAT1</i></i>                          | This study  |
| KFY100 ( <i>cdc48-10</i> WT background)                                                   | <i>MATa his4-619 leu2-3,112 ura3-52</i>                                                                                                                                              | S. Bar-Nun  |
| KFY194 ( <i>cdc48-10</i> )                                                                | <i>MATa his4-619 leu2-3,112 ura3-52 <i>cdc48-10<sup>ts</sup></i></i>                                                                                                                 | S. Bar-Nun  |
| SBN 100 ( <i>cdc48-10</i> WT background)                                                  | <i>MATa his4-619 leu2-3,112 ura3-52 trp1::LEU2</i>                                                                                                                                   | S. Bar-Nun  |
| SBN194 ( <i>cdc48-10</i> )                                                                | <i>MATa his4-619 leu2-3,112 ura3-52 <i>cdc48-10<sup>ts</sup> trp1::LEU2</i></i>                                                                                                      | S. Bar-Nun  |
| RK10 ( <i>cdc48-10 ddi1<math>\Delta</math></i> )                                          | <i>MATa his4-619 leu2-3,112 ura3-52 <i>cdc48-10<sup>ts</sup> ddi1<math>\Delta</math>::NAT1</i></i>                                                                                   | This study  |
| <i>cps1<math>\Delta</math></i>                                                            | <i>MATa his3<math>\Delta</math>1 leu2<math>\Delta</math> met15<math>\Delta</math>0 ura3<math>\Delta</math>0 <i>cps1<math>\Delta</math>::kanMX</i></i>                                | Euroscarf   |
| VL2 ( <i>ddi1<math>\Delta</math></i> ; W303-1a background)                                | <i>MATa his3-11,15 leu2-3,112 trp1-1 ade2-1 ddi1<math>\Delta</math>::URA3</i>                                                                                                        | J. Gerst    |
| <i>ddi1<math>\Delta</math></i> (W303-1b background)                                       | <i>MAT<math>\alpha</math> can1-100 his3-11,15 leu2-3,112 lys2-1 trp1-1 ura3-1 ade2-1 ddi1<math>\Delta</math>::NAT1</i>                                                               | This study  |
| <i>ddi1<math>\Delta</math></i> (BY4741 background)                                        | <i>MATa his3<math>\Delta</math>1 leu2<math>\Delta</math> met15<math>\Delta</math>0 ura3<math>\Delta</math>0 <i>ddi1<math>\Delta</math>::kanMX</i></i>                                | Euroscarf   |
| GGY21 ( <i>ddi1<math>\Delta</math> rad23<math>\Delta</math></i> )                         | <i>MATa his3<math>\Delta</math>1 leu2<math>\Delta</math> met15<math>\Delta</math>0 ura3<math>\Delta</math>0 <i>rad23<math>\Delta</math>::kanMX ddi1<math>\Delta</math>::URA3</i></i> | This study  |
| GGY22 ( <i>ddi1<math>\Delta</math> rad23<math>\Delta</math> dsk2<math>\Delta</math></i> ) | <i>MATa leu<math>\Delta</math>0 met15<math>\Delta</math>0 <i>rad23<math>\Delta</math>::HIS3 ddi1<math>\Delta</math>::URA3 dsk2<math>\Delta</math>::kanMX</i></i>                     | This study  |
| GGY10 ( <i>ddi1<math>\Delta</math> vps23<math>\Delta</math></i> )                         | <i>MATa his3<math>\Delta</math>1 leu2<math>\Delta</math> met15<math>\Delta</math>0 ura3<math>\Delta</math>0 <i>vps23<math>\Delta</math>::kanMX ddi1<math>\Delta</math>::URA3</i></i> | This study  |
| GGY13 ( <i>GAL-GFP-DDI1 vps23<math>\Delta</math></i> )                                    | <i>MATa leu<math>\Delta</math>0 met15<math>\Delta</math>0 ura3<math>\Delta</math>0 <i>GAL1-GFP-DDI1::HIS3 vps23<math>\Delta</math>::kanMX</i></i>                                    | This study  |
| <i>doa1<math>\Delta</math></i>                                                            | <i>MATa his3<math>\Delta</math>1 leu2<math>\Delta</math> met15<math>\Delta</math>0 ura3<math>\Delta</math>0 <i>doa1<math>\Delta</math>::kanMX</i></i>                                | Euroscarf   |
| RK11 <i>dsk2<math>\Delta</math></i> (W303-1b background)                                  | <i>MAT<math>\alpha</math> can1-100 his3-11,15 leu2-3,112 lys2-1 trp1-1 ura3-1 ade2-1 <i>dsk2<math>\Delta</math>::NAT1</i></i>                                                        | This study  |
| YYH46 ( <i>NPL4</i> )                                                                     | <i>MATa ura3-52 leu2<math>\Delta</math>1 trp1<math>\Delta</math>63 (originally PSY580)</i>                                                                                           | P. Carvalho |
| YYH1 ( <i>npl4-1</i> )                                                                    | <i>MATa ura3-52 leu2<math>\Delta</math>1 trp1<math>\Delta</math>63 <i>npl4-1<sup>ts</sup></i> (originally PSY2340)</i>                                                               | P. Carvalho |
| YYH2 ( <i>npl4-2</i> )                                                                    | <i>MATa ura3-52 leu2<math>\Delta</math>1 trp1<math>\Delta</math>63 <i>npl4-2<sup>ts</sup></i> (originally PSY2341)</i>                                                               | P. Carvalho |
| <i>npl4<math>\Delta</math></i>                                                            | <i>MATa his3<math>\Delta</math>1 leu2<math>\Delta</math> met15<math>\Delta</math>0 ura3<math>\Delta</math>0 <i>npl4<math>\Delta</math>::kanMX</i></i>                                | Euroscarf   |
| RK9 ( <i>npl4<math>\Delta</math> ddi1<math>\Delta</math></i> )                            | <i>MATa his3<math>\Delta</math>1 leu2<math>\Delta</math> met15<math>\Delta</math>0 ura3<math>\Delta</math>0 <i>npl4<math>\Delta</math>::kanMX ddi1<math>\Delta</math>::NAT1</i></i>  | This study  |
| JBY120 ( <i>SNF7-RFP</i> )                                                                | <i>MAT his3<math>\Delta</math>1 leu2<math>\Delta</math>0 lys2<math>\Delta</math>0 ura3<math>\Delta</math>0 <i>SNF7-RFP::KanMX4</i></i>                                               | W. Huh      |
| RK12 <i>rad23<math>\Delta</math></i> (W303-1b background)                                 | <i>MAT<math>\alpha</math> can1-100 his3-11,15 leu2-3,112 lys2-1 trp1-1 ura3-1 ade2-1 <i>rad23<math>\Delta</math>::NAT1</i></i>                                                       | This study  |
| TCY6210 WT                                                                                | <i>MAT<math>\alpha</math> leu2-3, 112 ura3-52 his3-<math>\Delta</math>200 trp1-<math>\Delta</math>901 lys2-801 <i>suc2<math>\Delta</math>9</i></i>                                   | S. Emr      |
| SSY22 ( <i>rsp5<sup>ts</sup></i> )                                                        | <i>MATa leu2-3, 112 ura3-52 his3-<math>\Delta</math>200 trp1-<math>\Delta</math>901 <i>ade2-101 suc2-<math>\Delta</math>9 <i>rsp5-326</i></i></i>                                    | S. Emr      |
| YYH3 ( <i>UFD1</i> )                                                                      | <i>MATa his4-519 ura3-52 ade1-100 leu2-3,112 (originally BWG1-7a)</i>                                                                                                                | P. Carvalho |
| YYH4 ( <i>ufd1-1</i> )                                                                    | <i>MATa <i>ufd1-1</i> (derivative of BWG1-7a; originally PM373)</i>                                                                                                                  | P. Carvalho |
| <i>vps4<math>\Delta</math></i>                                                            | <i>MATa his3<math>\Delta</math>1 leu2<math>\Delta</math> met15<math>\Delta</math>0 ura3<math>\Delta</math>0 <i>vps23<math>\Delta</math>::kanMX</i></i>                               | Euroscarf   |
| <i>vps23<math>\Delta</math></i>                                                           | <i>MATa his3<math>\Delta</math>1 leu2<math>\Delta</math> met15<math>\Delta</math>0 ura3<math>\Delta</math>0 <i>vps4<math>\Delta</math>::kanMX</i></i>                                | Euroscarf   |
| <i>vps27<math>\Delta</math></i>                                                           | <i>MATa his3<math>\Delta</math>1 leu2<math>\Delta</math> met15<math>\Delta</math>0 ura3<math>\Delta</math>0 <i>vps27<math>\Delta</math>::kanMX</i></i>                               | Euroscarf   |
| <i>vps37<math>\Delta</math></i>                                                           | <i>MATa his3<math>\Delta</math>1 leu2<math>\Delta</math> met15<math>\Delta</math>0 ura3<math>\Delta</math>0 <i>vps37<math>\Delta</math>::kanMX</i></i>                               | Euroscarf   |

|                                                    |                                                                                                                                  |            |
|----------------------------------------------------|----------------------------------------------------------------------------------------------------------------------------------|------------|
| RK12 [myc(x9)-Cps1]                                | <i>MAT<math>\alpha</math> can1-100 his3-2,15 leu2-3,112 lys2-1 trp1-1 ura3-1 ade2-1 CPS1::myc(x9)-CPS1</i>                       | This study |
| RK13 [ <i>cdc48-10 ddi1</i> $\Delta$ myc(x9)-Cps1] | <i>MAT<math>\alpha</math> his4-519 leu2-3,112 ura3-52 cdc48-10<sup>ts</sup> ddi1<math>\Delta</math>::NAT1 CPS1::myc(x9)-CPS1</i> | This Study |
| RK14 [ <i>cdc48-10 ddi1</i> $\Delta$ myc(x9)-Pil]  | <i>MAT<math>\alpha</math> his4-519 leu2-3,112 ura3-52 cdc48-10<sup>ts</sup> ddi1<math>\Delta</math>::NAT1 PIL1::myc(x9)-PIL1</i> | This Study |

**Table S2. Plasmids used in this study**

| Plasmid name                                        | Gene expressed                                          | Vector              | Sites of cloning | Copy number | Selectable marker | Source     |
|-----------------------------------------------------|---------------------------------------------------------|---------------------|------------------|-------------|-------------------|------------|
| pAD54                                               | <i>HA</i>                                               |                     |                  | 2 $\mu$     | <i>LEU2</i>       | J. Gerst   |
| pADH-HA-GFP                                         | <i>HA-GFP</i>                                           | pAD54               | <i>SalI/SacI</i> | 2 $\mu$     | <i>LEU2</i>       | J. Gerst   |
| pADH-HA-DDI1                                        | <i>HA-DDI1</i>                                          | pAD54               | <i>SalI/SacI</i> | 2 $\mu$     | <i>LEU2</i>       | J. Gerst   |
| pADH-DDI1 <sup>1-163</sup>                          | <i>HA-DDI1<sup>1-163</sup></i>                          | pAD54               | <i>SalI/SacI</i> | 2 $\mu$     | <i>LEU2</i>       | J. Gerst   |
| pADH-DDI1 <sup>1-326</sup>                          | <i>HA-DDI1<sup>1-326</sup></i>                          | pAD54               | <i>SalI/SacI</i> | 2 $\mu$     | <i>LEU2</i>       | J. Gerst   |
| pADH-DDI1 <sup>1-389</sup>                          | <i>HA-DDI1<sup>1-389</sup></i>                          | pAD54               | <i>SalI/SacI</i> | 2 $\mu$     | <i>LEU2</i>       | J. Gerst   |
| pADH-DDI1 <sup>D220A</sup>                          | <i>HA-DDI1<sup>D220A</sup></i>                          | pAD54               | <i>SalI/SacI</i> | 2 $\mu$     | <i>LEU2</i>       | J. Gerst   |
| pADH-DDI1 <sup>78-428</sup>                         | <i>HA-DDI1<sup>78-428</sup></i>                         | pAD54               | <i>SalI/SacI</i> | 2 $\mu$     | <i>LEU2</i>       | J. Gerst   |
| pADH-DDI1 <sup><math>\Delta</math>202-299</sup>     | <i>HA-DDI1<sup><math>\Delta</math>202-298</sup></i>     | pAD54               | <i>SalI/SacI</i> | 2 $\mu$     | <i>LEU2</i>       | J. Gerst   |
| pADH-DDI1 <sup><math>\Delta</math>323-344</sup>     | <i>HA-DDI1<sup>323-344</sup></i>                        | pAD54               | <i>SalI/SacI</i> | 2 $\mu$     | <i>LEU2</i>       | J. Gerst   |
| pADH-DDI1 <sup>78-326</sup>                         | <i>HA-DDI1<sup>78-326</sup></i>                         | pAD54               | <i>SalI/SacI</i> | 2 $\mu$     | <i>LEU2</i>       | J. Gerst   |
| pADH-DDI1 <sup><math>\Delta</math>323-390</sup>     | <i>HA-DDI1<sup><math>\Delta</math>323-390</sup></i>     | pAD54               | <i>SalI/SacI</i> | 2 $\mu$     | <i>LEU2</i>       | J. Gerst   |
| pADH-GFP-DDI1                                       | <i>HA-GFP-DDI1</i>                                      | pAD54               | <i>SalI/SacI</i> | 2 $\mu$     | <i>LEU2</i>       | J. Gerst   |
| pADH-GFP-DDI1 <sup>1-75</sup>                       | <i>HA-GFP-DDI1<sup>1-75</sup></i>                       | pAD54               | <i>SalI/SacI</i> | 2 $\mu$     | <i>LEU2</i>       | J. Gerst   |
| pADH-GFP-DDI1 <sup>1-163</sup>                      | <i>HA-GFP-DDI1<sup>1-163</sup></i>                      | pAD54               | <i>SalI/SacI</i> | 2 $\mu$     | <i>LEU2</i>       | J. Gerst   |
| pADH-GFP-DDI1 <sup>1-326</sup>                      | <i>HA-GFP-DDI1<sup>1-326</sup></i>                      | pAD54               | <i>SalI/SacI</i> | 2 $\mu$     | <i>LEU2</i>       | J. Gerst   |
| pADH-GFP-DDI1 <sup>1-389</sup>                      | <i>HA-GFP-DDI1<sup>1-389</sup></i>                      | pAD54               | <i>SalI/SacI</i> | 2 $\mu$     | <i>LEU2</i>       | J. Gerst   |
| pADH-GFP-DDI1 <sup>D220A</sup>                      | <i>HA-GFP-DDI1<sup>D220A</sup></i>                      | pAD54               | <i>SalI/SacI</i> | 2 $\mu$     | <i>LEU2</i>       | J. Gerst   |
| pADH-GFP-DDI1 <sup>78-428</sup>                     | <i>HA-GFP-DDI1<sup>78-428</sup></i>                     | pAD54               | <i>SalI/SacI</i> | 2 $\mu$     | <i>LEU2</i>       | J. Gerst   |
| pADH-GFP-DDI1 <sup><math>\Delta</math>202-299</sup> | <i>HA-GFP-DDI1<sup><math>\Delta</math>202-298</sup></i> | pAD54               | <i>SalI/SacI</i> | 2 $\mu$     | <i>LEU2</i>       | J. Gerst   |
| pADH-GFP-DDI1 <sup><math>\Delta</math>323-344</sup> | <i>HA-GFP-DDI1<sup><math>\Delta</math>323-344</sup></i> | pAD54               | <i>SalI/SacI</i> | 2 $\mu$     | <i>LEU2</i>       | J. Gerst   |
| pADH-GFP-DDI1 <sup>78-326</sup>                     | <i>HA-GFP-DDI1<sup>78-326</sup></i>                     | pAD54               | <i>SalI/SacI</i> | 2 $\mu$     | <i>LEU2</i>       | J. Gerst   |
| pADH-RFP-DDI1                                       | <i>HA-RFP-DDI1</i>                                      | pAD54               | <i>SalI/SacI</i> | 2 $\mu$     | <i>LEU2</i>       | This study |
| pADH-GFP-RAD23                                      | <i>HA-GFP-RAD23</i>                                     | pAD54               | <i>SalI/SacI</i> | 2 $\mu$     | <i>LEU2</i>       | This study |
| pGOGFP-CPS1                                         | <i>GFP-CPS1</i>                                         | pRS426              | -                | 2 $\mu$     | <i>URA3</i>       | C. Stefan  |
| pMB118                                              | <i>GFP-CPS1</i>                                         |                     | -                | 2 $\mu$     | <i>LEU2</i>       | M. Babst   |
| pADH-CPS1                                           | <i>HA-CPS1</i>                                          | pAD54               | <i>SmaI-SacI</i> | 2 $\mu$     | <i>LEU2</i>       | This study |
| pGO-GFP-VPS27                                       | <i>GFP-VPS27</i>                                        | pRS426              | <i>BamHI</i>     | 2 $\mu$     | <i>URA3</i>       | S. Emr     |
| pADH-RFP-VPS27                                      | <i>HA-RFP-VPS27</i>                                     | pAD54               | <i>SalI/SacI</i> | 2 $\mu$     | <i>LEU2</i>       | J. Gerst   |
| pRS315-STE2-GFP                                     | <i>STE2-GFP</i>                                         | pRS315              | -                | <i>CEN</i>  | <i>LEU2</i>       | R. Piper   |
| pUG45-CDC48-GFP                                     | <i>CDC48-GFP</i>                                        | pUG45               |                  | <i>CEN</i>  | <i>URA3</i>       | This study |
| pADH-GFP-SNX4                                       | <i>HA-GFP-SNX4</i>                                      | pAD54               | <i>SalI</i>      | 2 $\mu$     | <i>LEU2</i>       | J. Gerst   |
| pRS313-VPS10-GFP                                    | <i>HA-VPS10-RFP</i>                                     | pRS313              | <i>BamHI</i>     | <i>CEN</i>  | <i>HIS3</i>       | J. Gerst   |
| pRS313-VPS10-RFP                                    | <i>HA-VPS10-RFP</i>                                     | pRS313              | <i>BamHI</i>     | <i>CEN</i>  | <i>HIS3</i>       | This study |
| pAD54-GFP-NPL4                                      | <i>HA-GFP-NPL4</i>                                      | pAD54               | <i>SmaI-SacI</i> | 2 $\mu$     | <i>LEU2</i>       | This study |
| pRS316-FUR4-GFP                                     | <i>HA-FUR4-GFP</i>                                      | pAD54               | <i>BamHI</i>     | <i>CEN</i>  | <i>LEU2</i>       | This Study |
| pRS316-GFP-YIF1                                     | <i>HA-GFP-YIF1</i>                                      | pRS316              | <i>BamHI</i>     | <i>CEN</i>  | <i>URA3</i>       | J. Gerst   |
| pGAL $\Delta$ BglII-CPY(1-50)-GFP                   | <i>CPY<sup>1-50</sup>-GFP</i>                           | pGAL $\Delta$ BglII |                  | <i>CEN</i>  | <i>URA3</i>       | D. Deloche |
| pRS425-UBL4                                         | <i>UBL4</i>                                             | pRS425              |                  | 2 $\mu$     | <i>HIS3</i>       | M. Babst   |
